# Supplementary figures and images for: Pentagone internalises glypicans to fine-tune multiple signalling pathways
Source: eLife journal article supplement (doi:10.7554/elife.13301), 2016-06-08

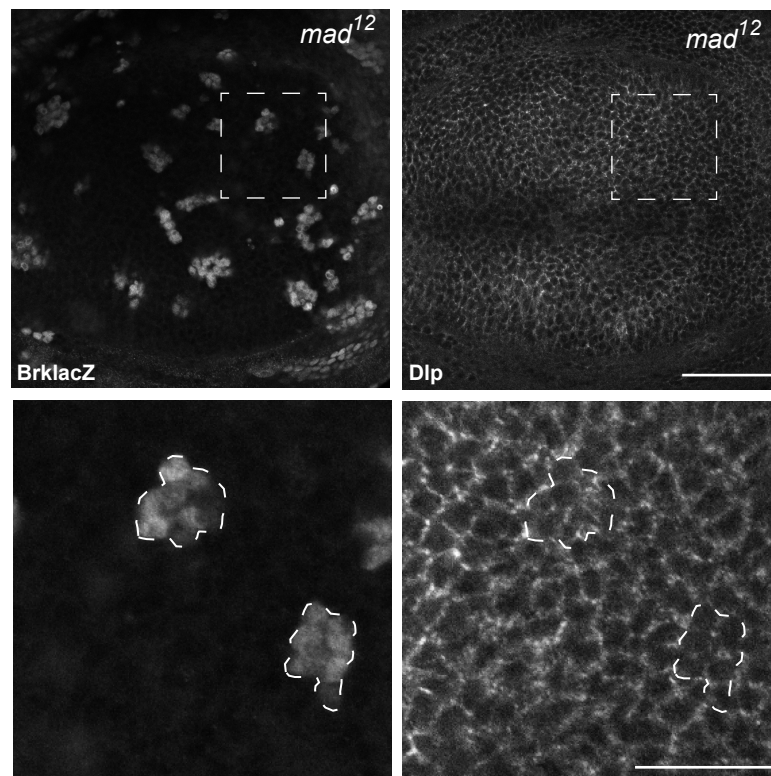

Supplement: supp [file elife-13301-supp-v2.zip]

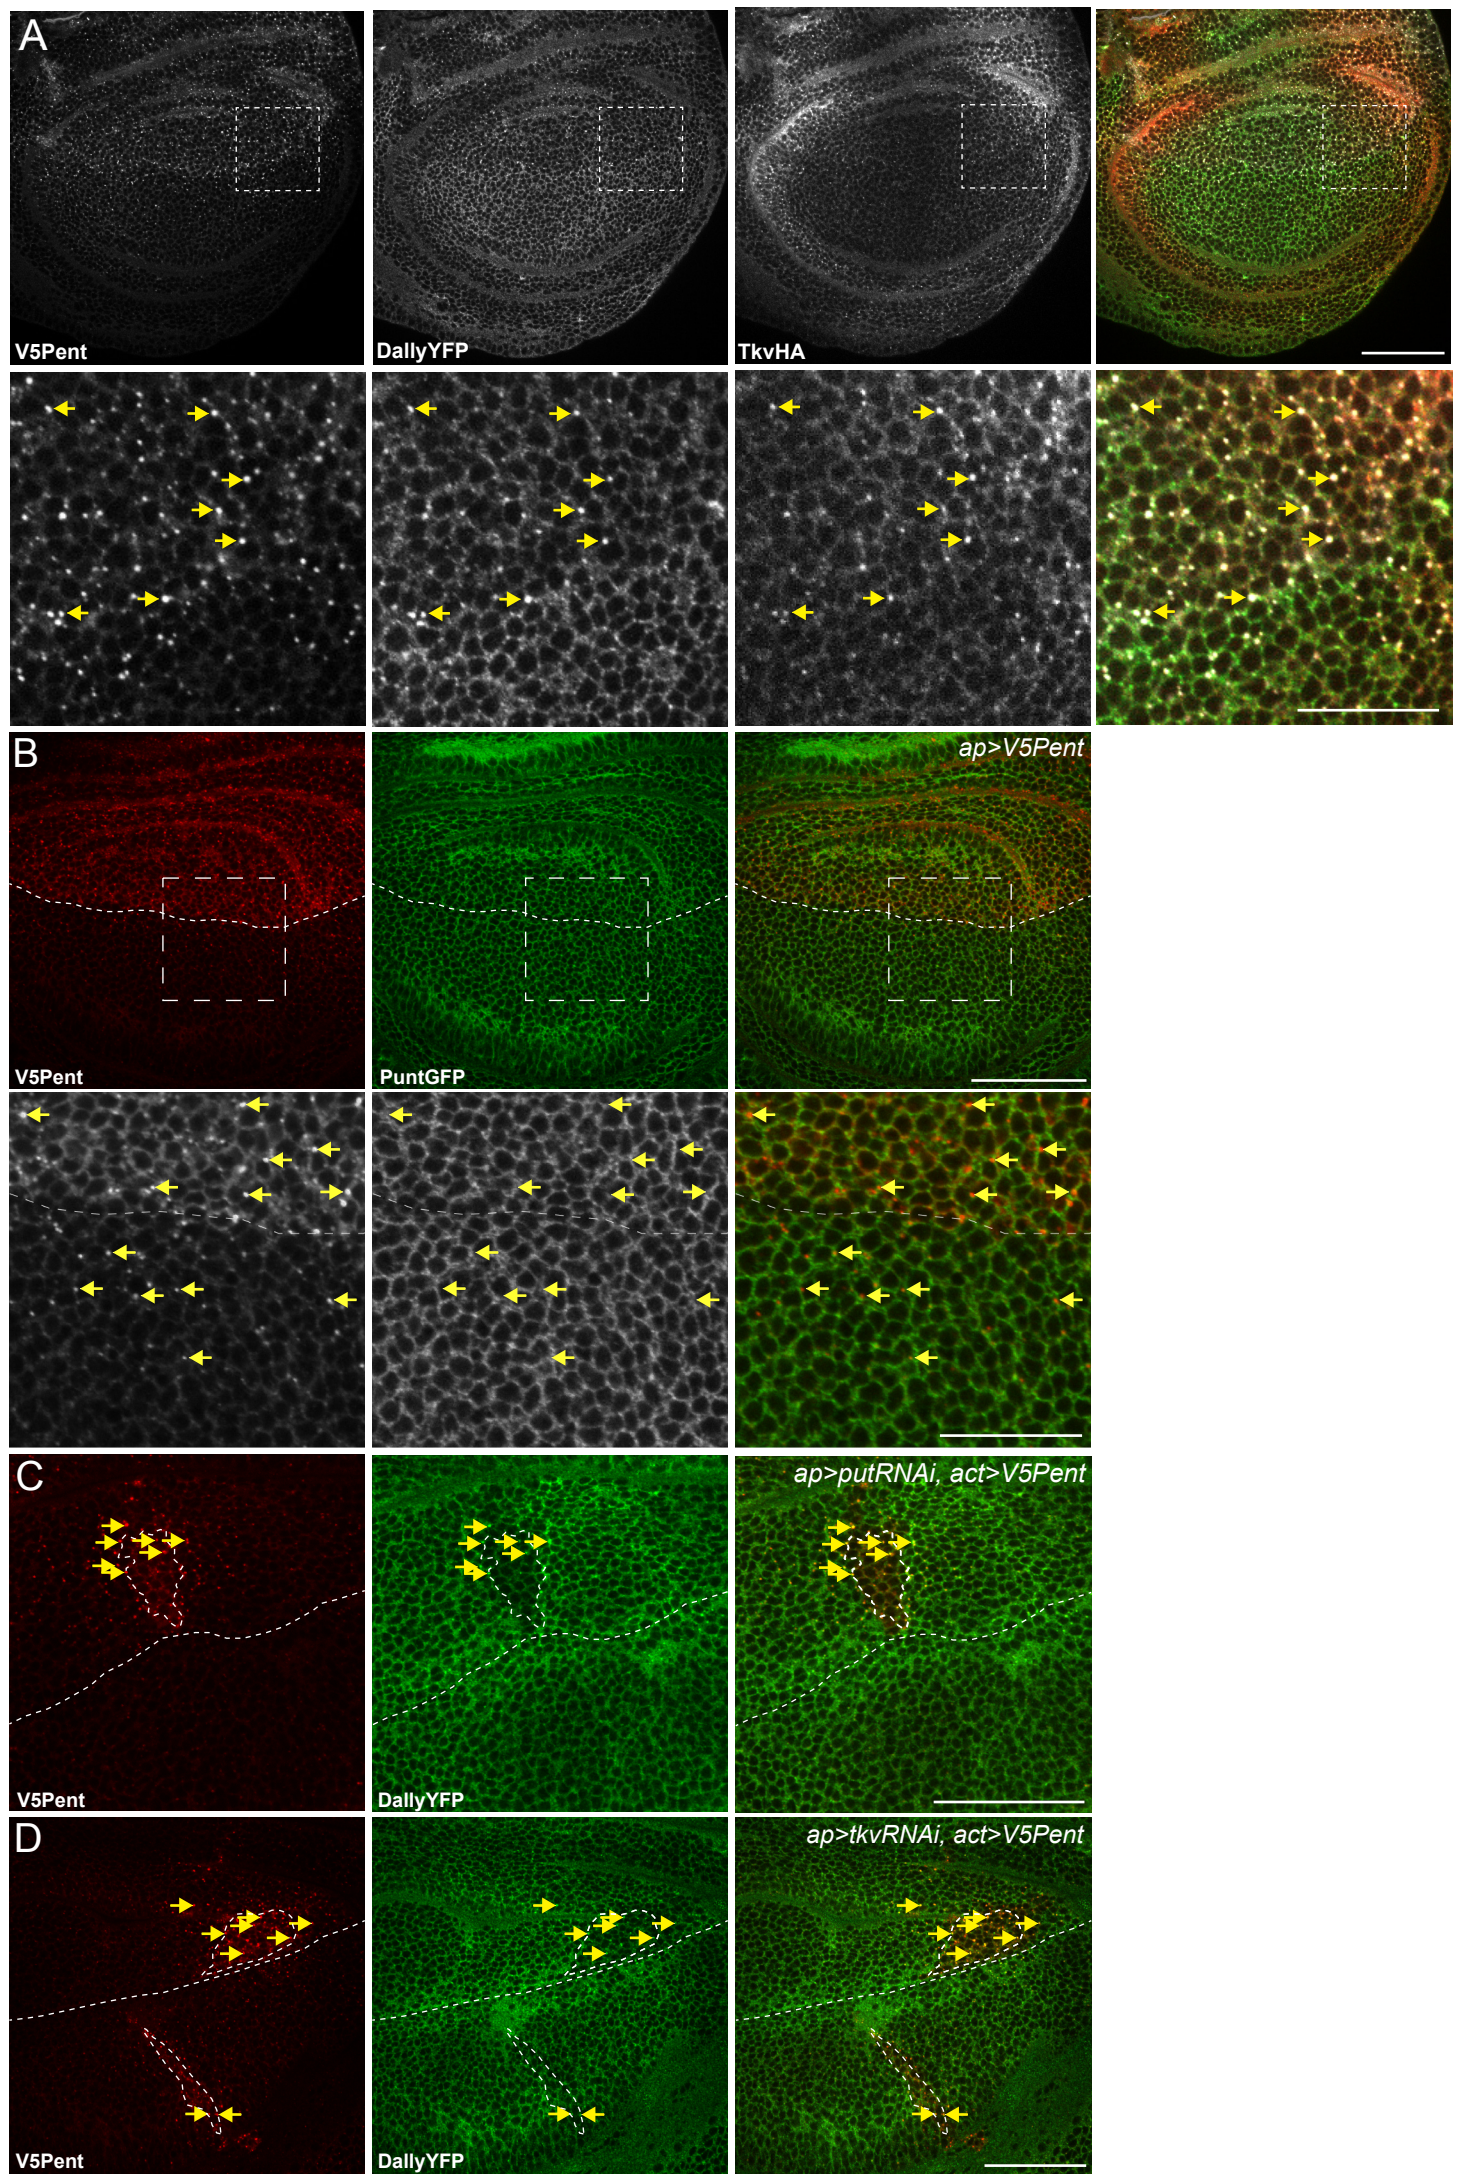

Supplement: supp [file elife-13301-supp-v2.zip]

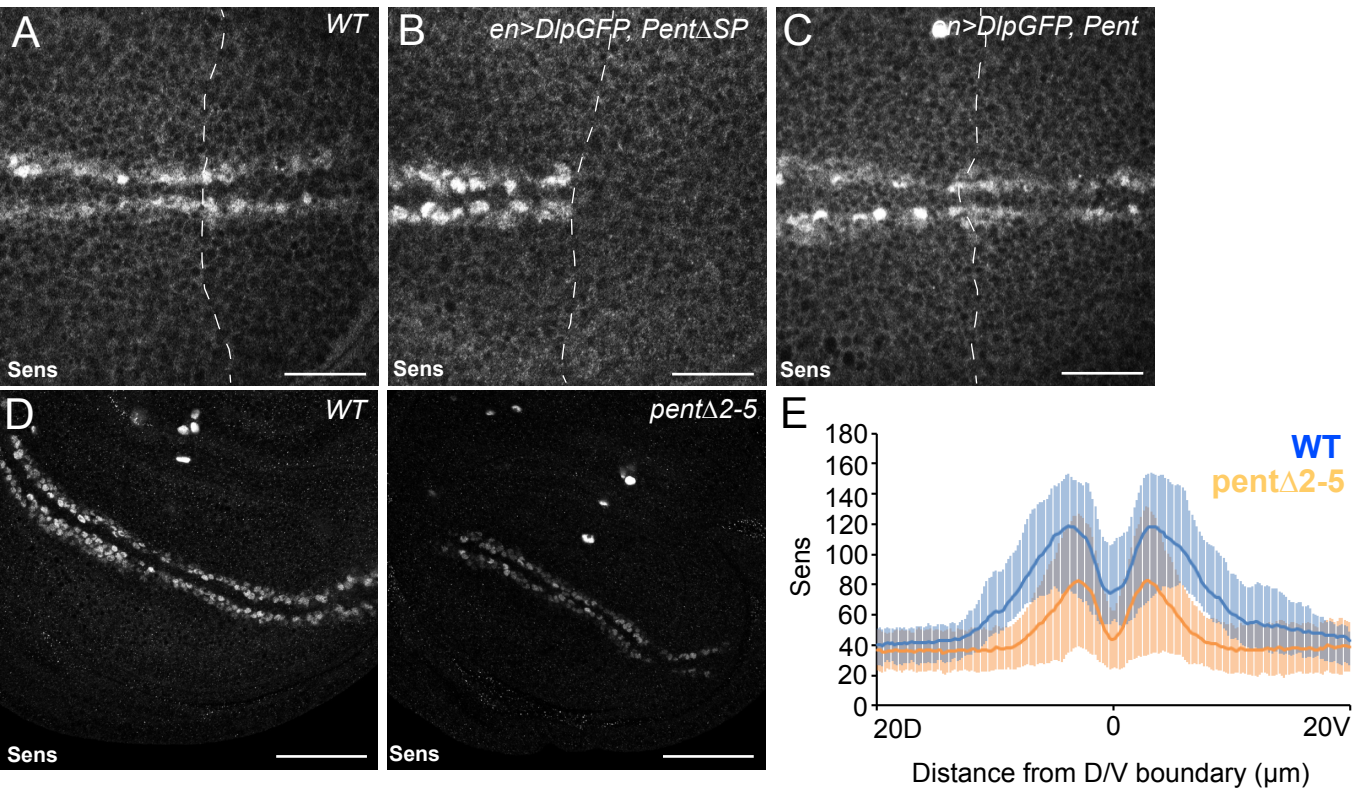

Supplement: supp [file elife-13301-supp-v2.zip]

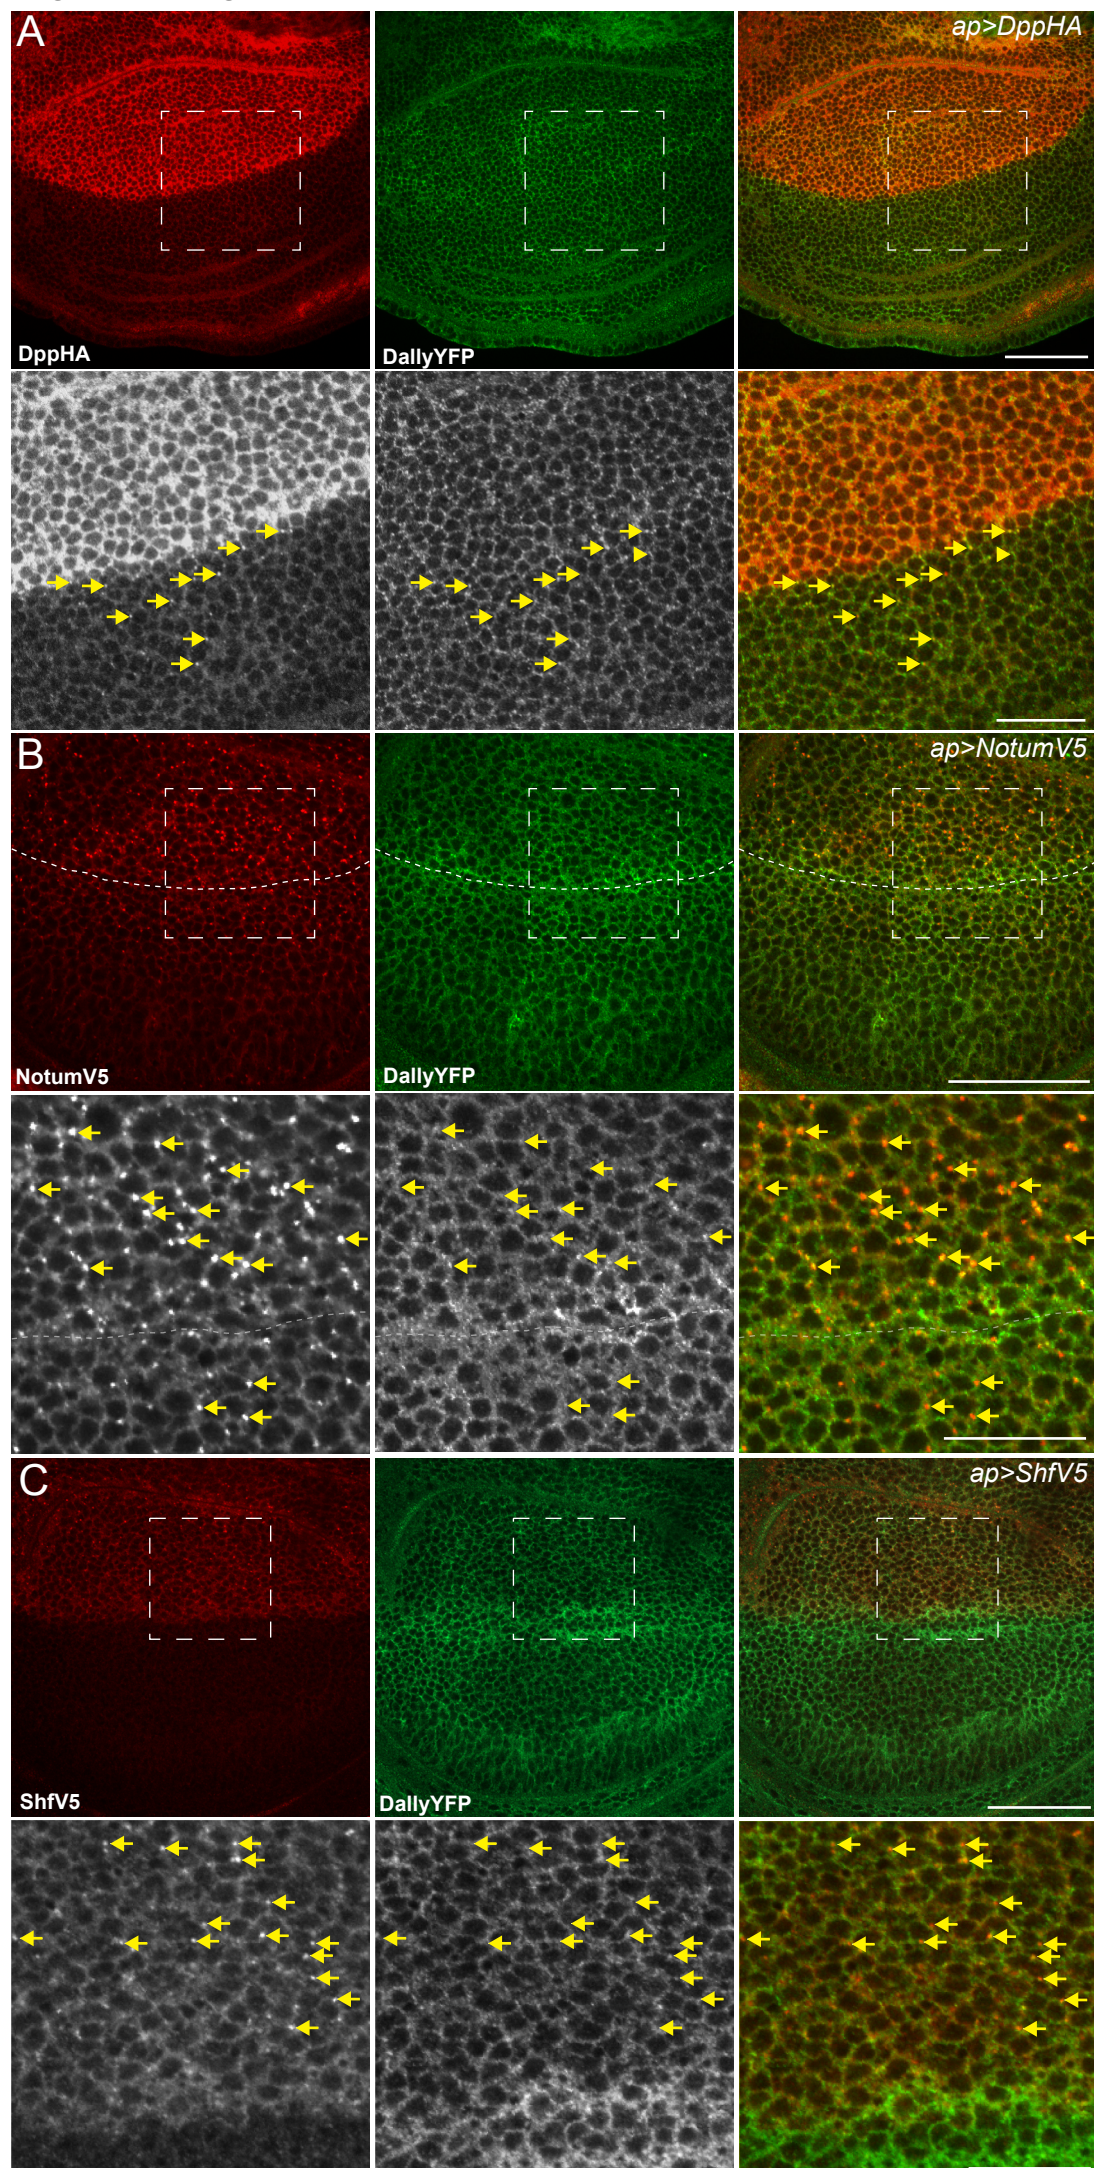

Supplement: supp [file elife-13301-supp-v2.zip]

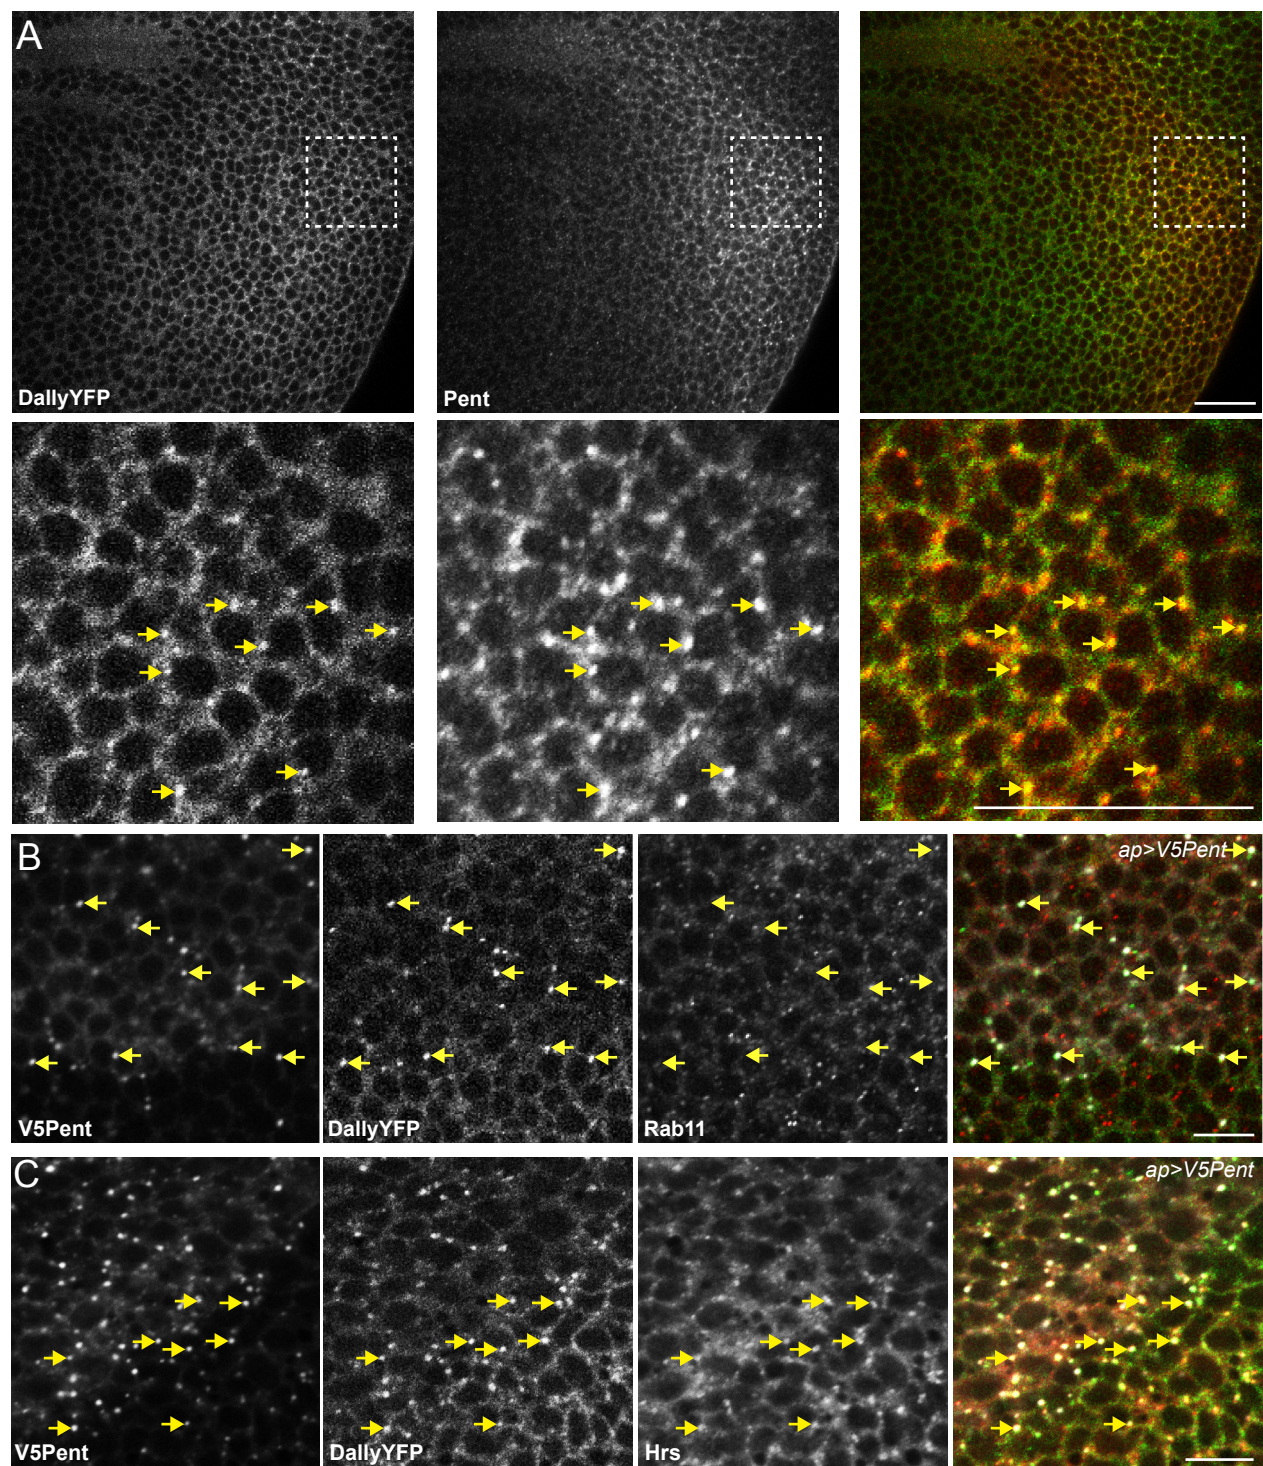

Supplement: supp [file elife-13301-supp-v2.zip]

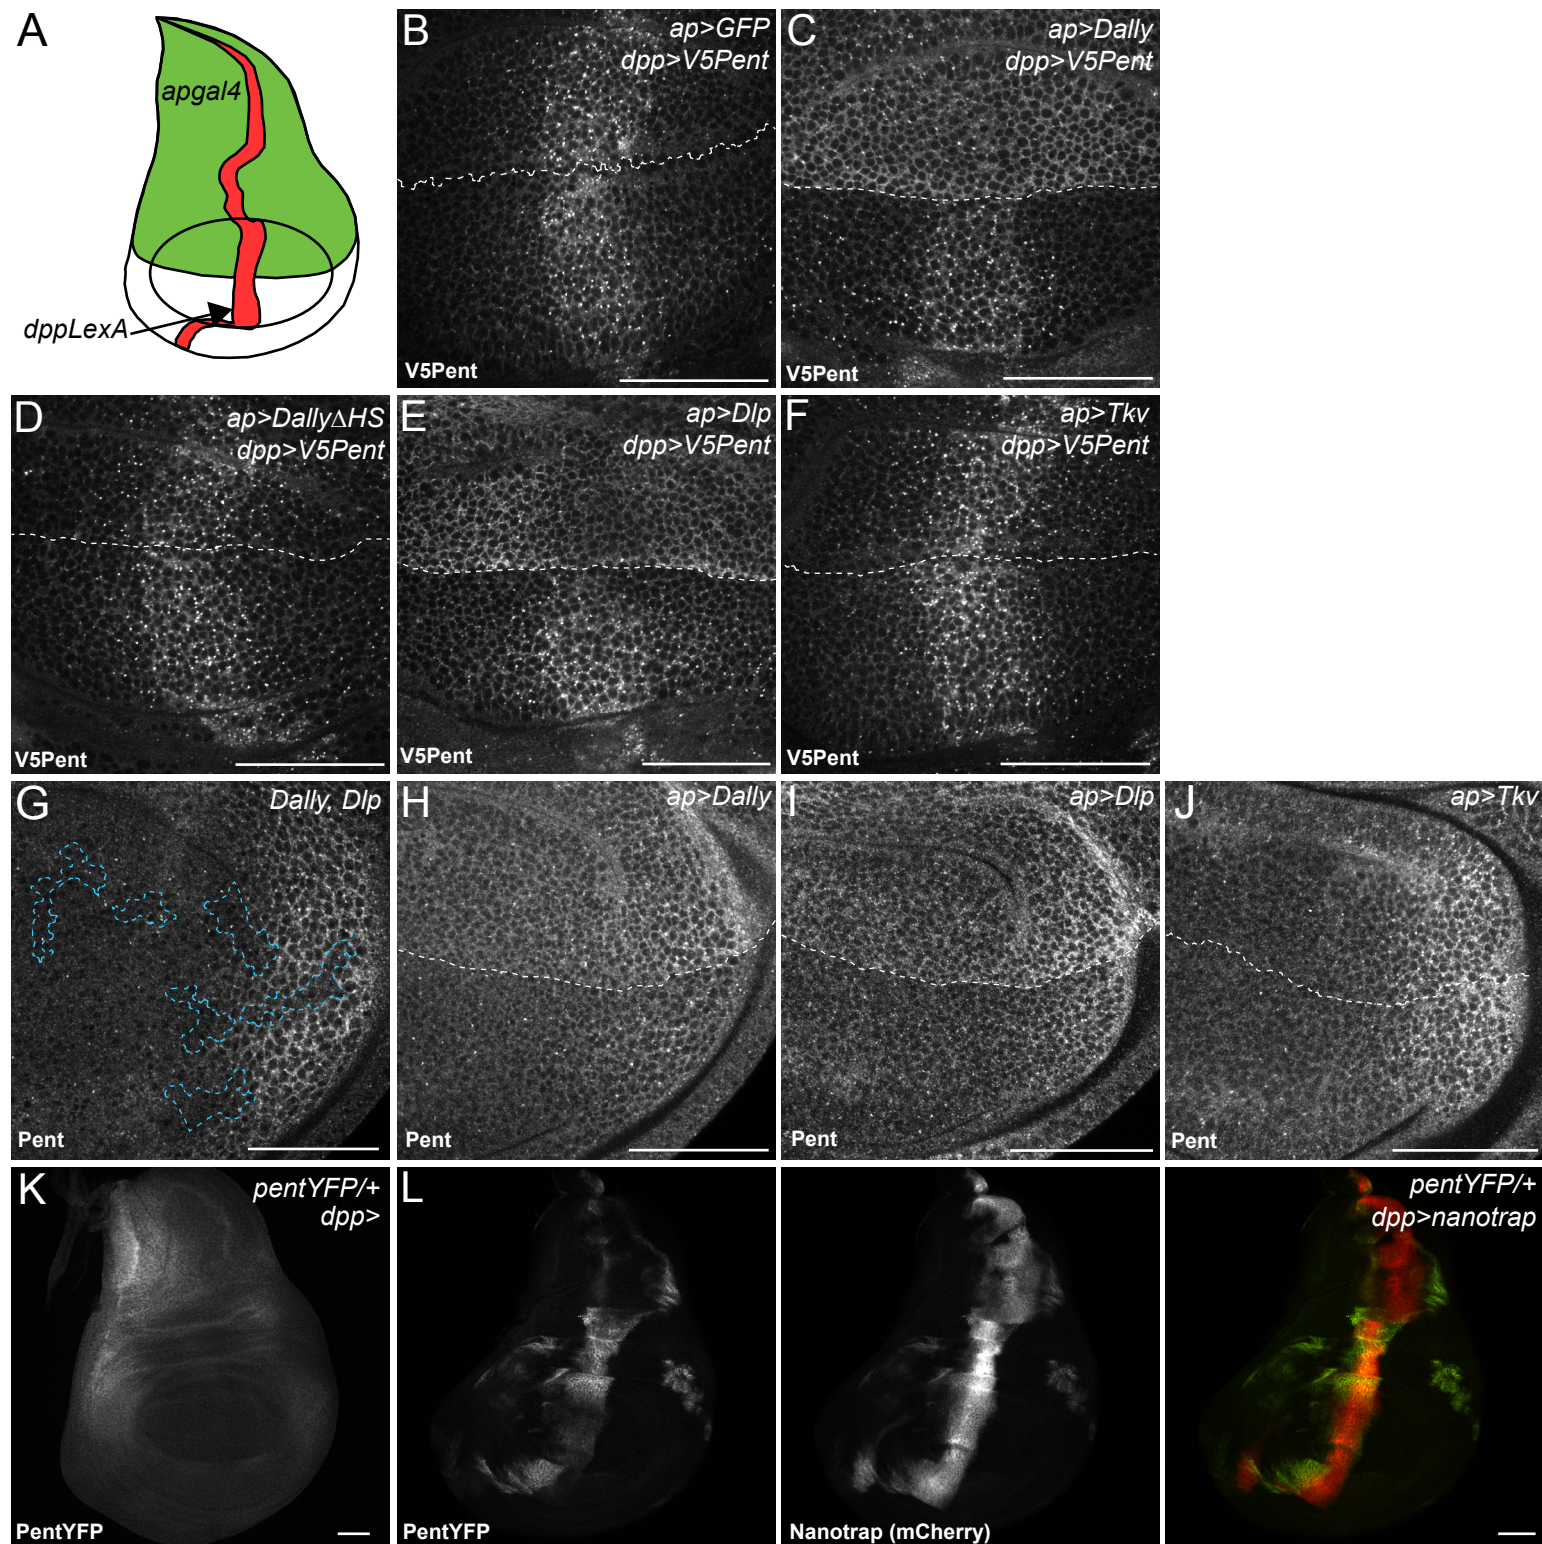

Supplement: supp [file elife-13301-supp-v2.zip]

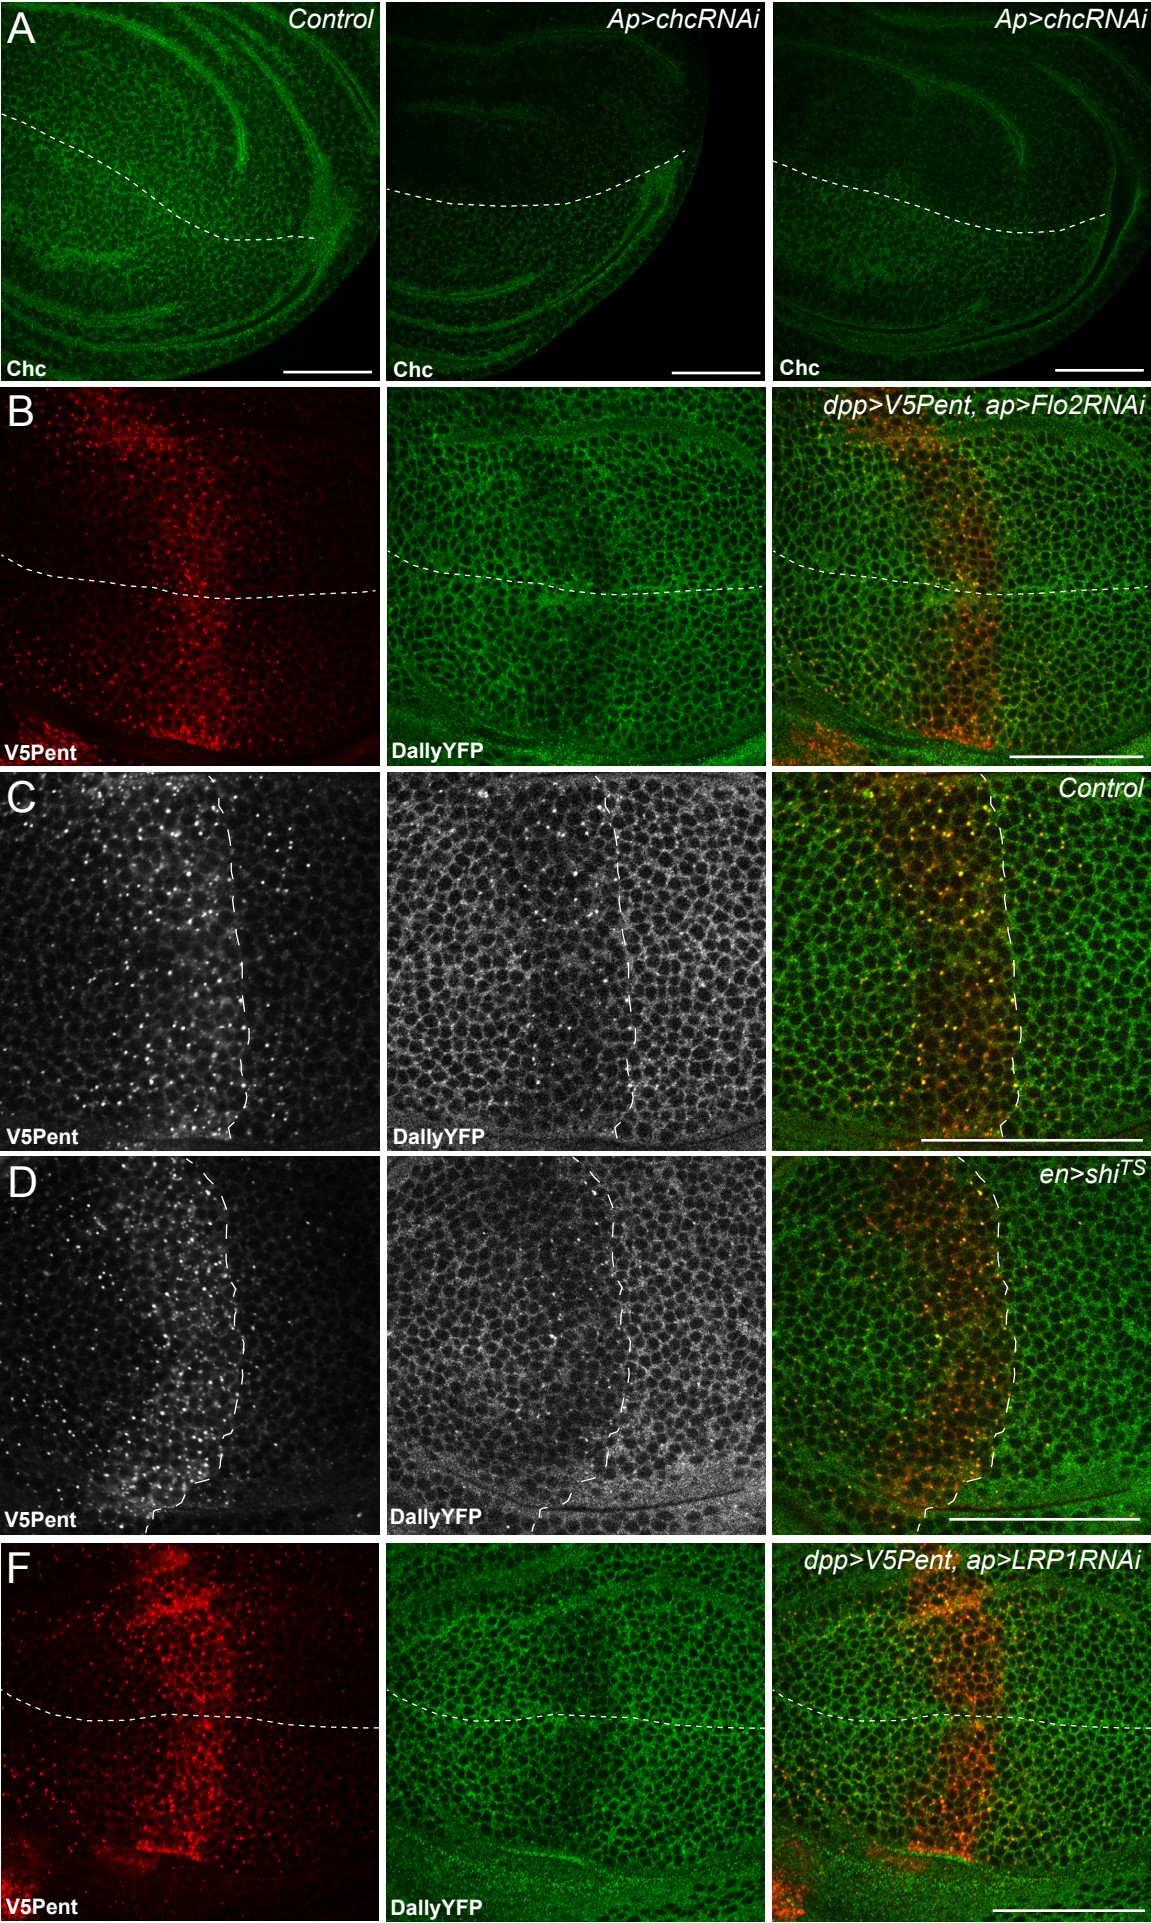

Supplement: supp [file elife-13301-supp-v2.zip]

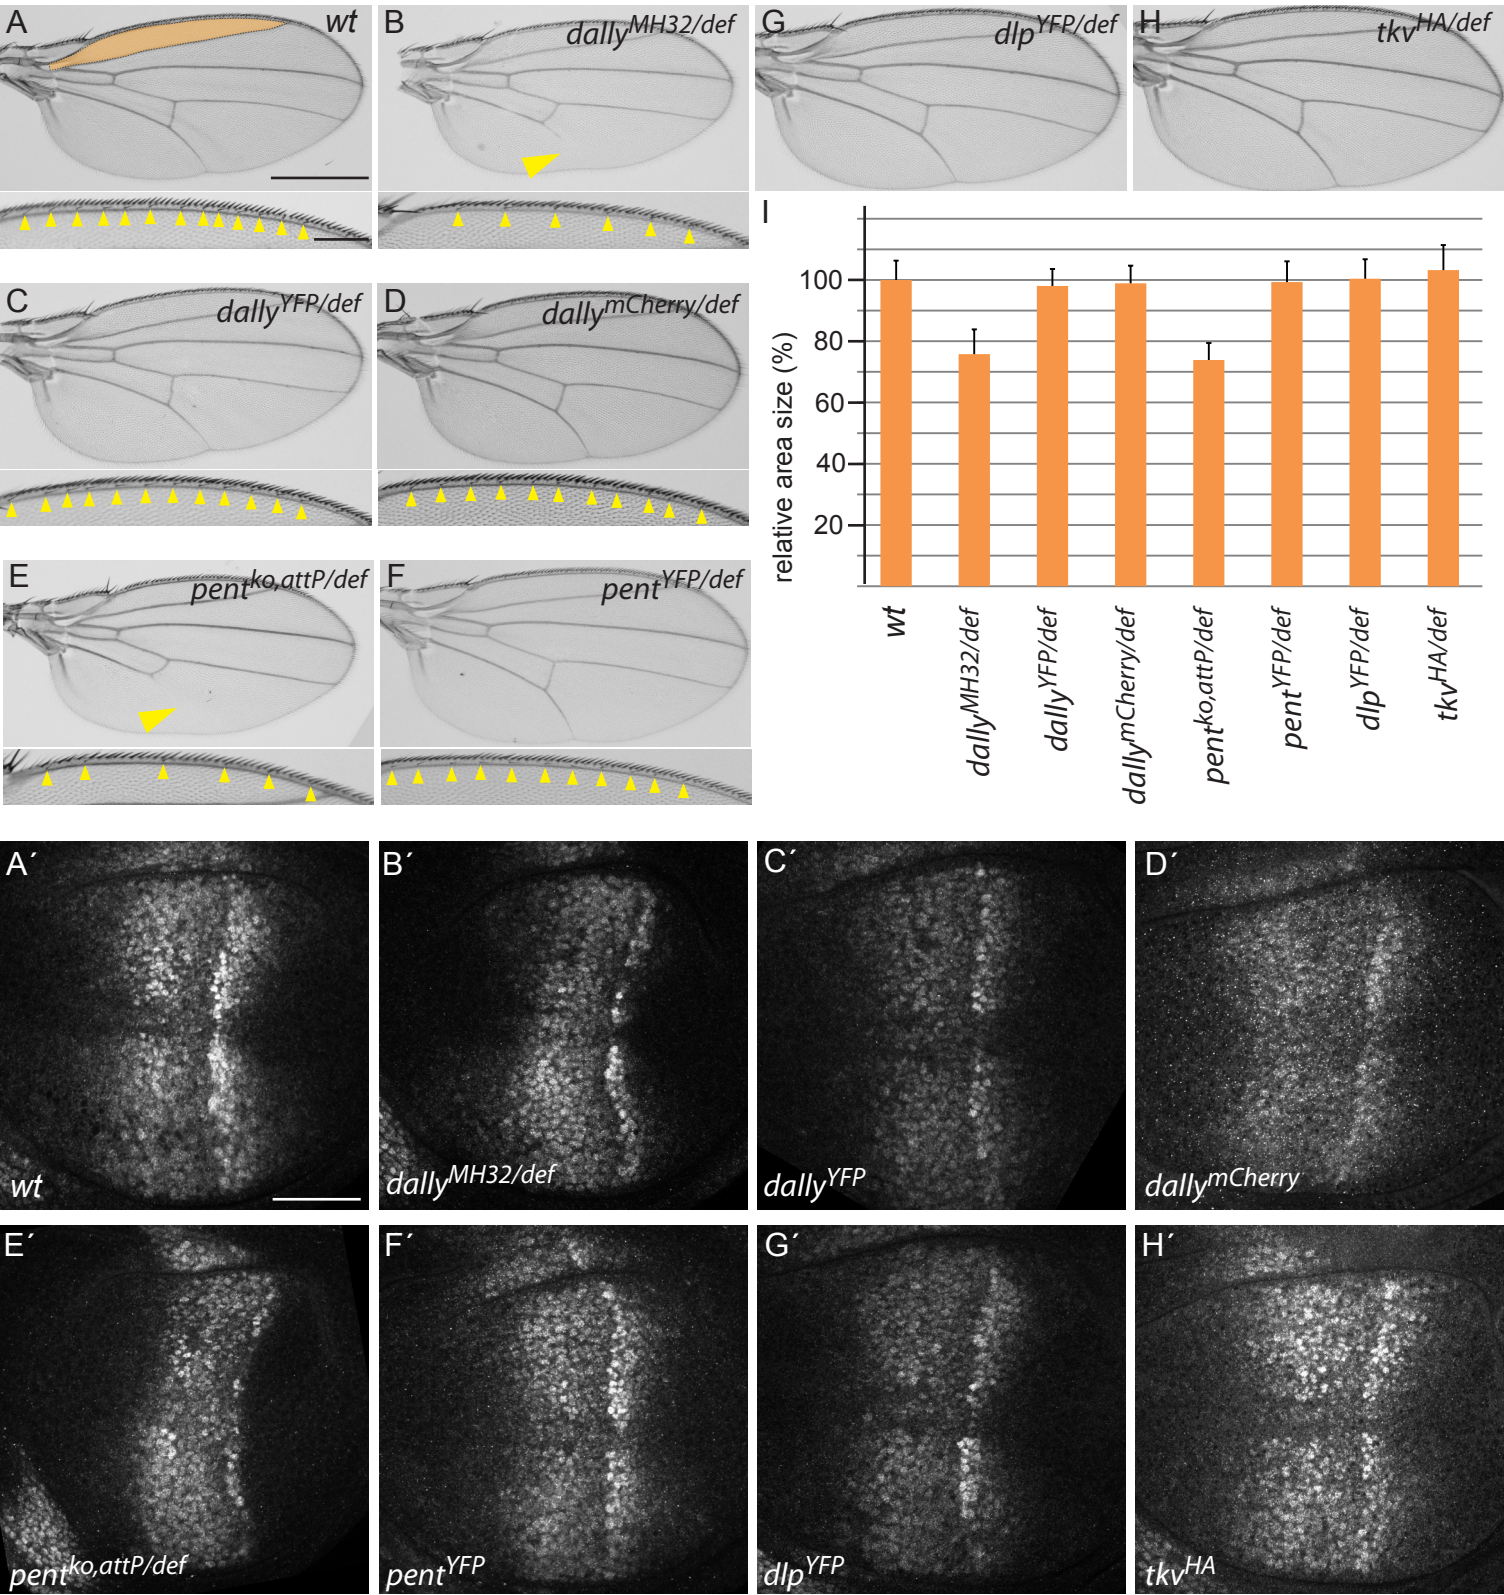

Supplement: supp [file elife-13301-supp-v2.zip]

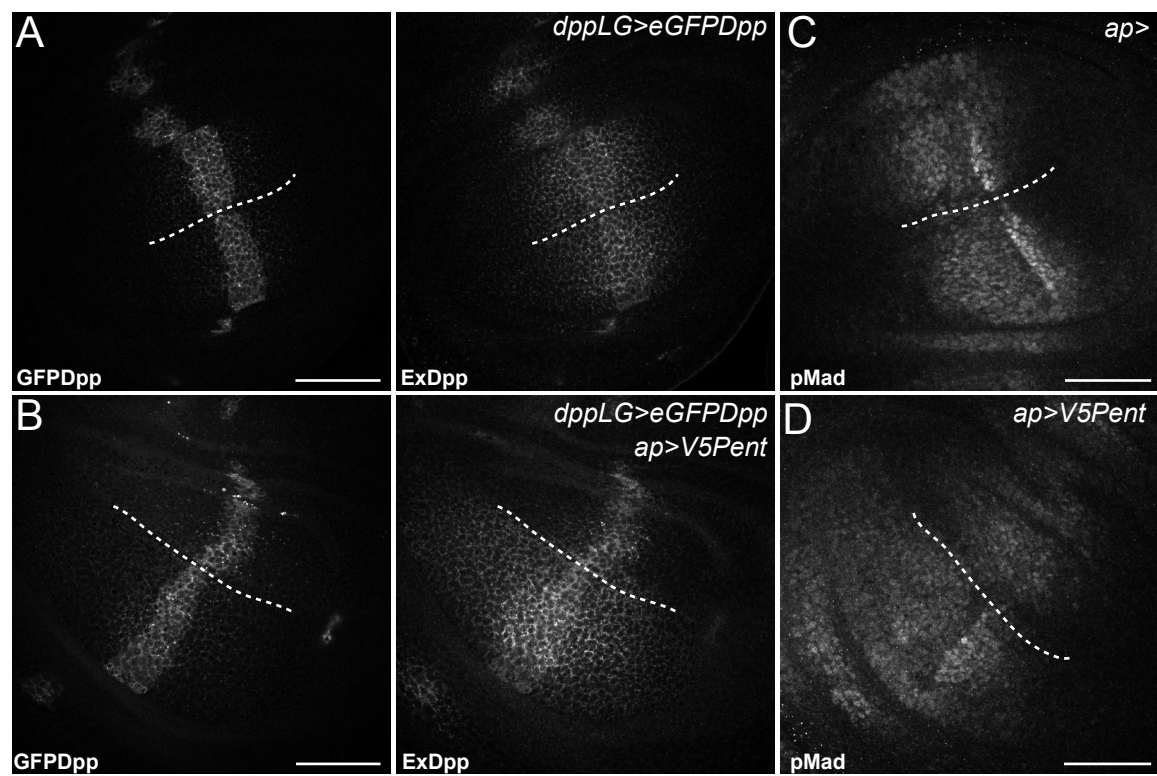

Supplement: supp [file elife-13301-supp-v2.zip]

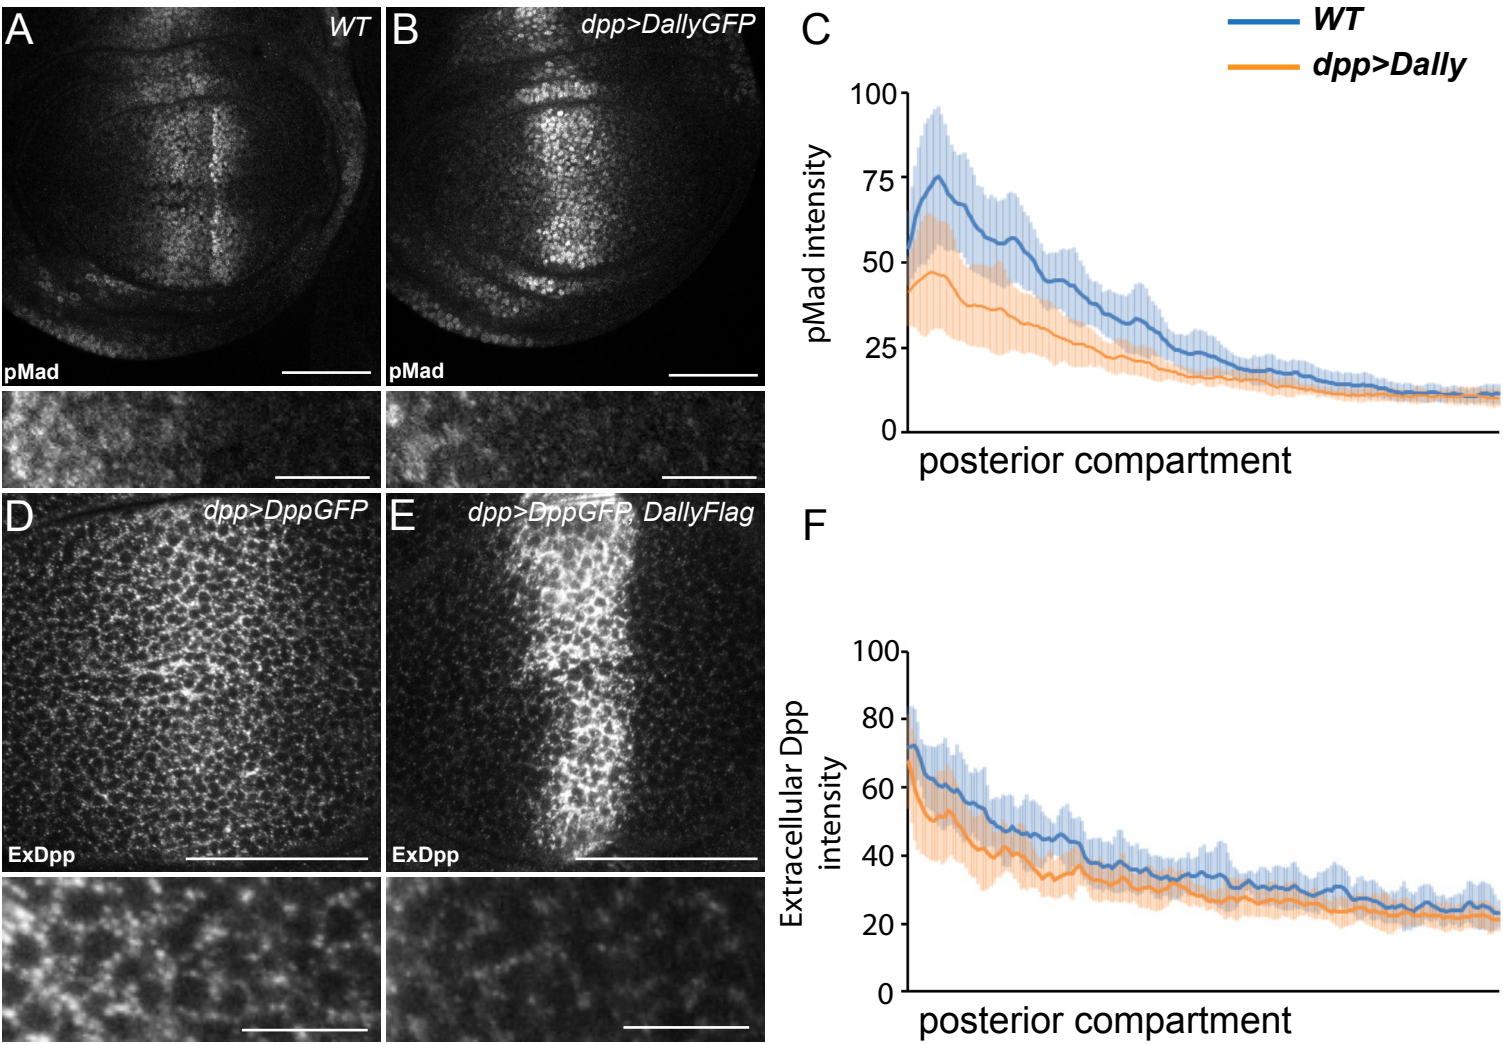

Supplement: supp [file elife-13301-supp-v2.zip]
